# Supplementary material for: Engineering of Optimized Hydrogel Formulations for Cartilage Repair
Source: MDPI journal article supplement (doi:10.3390/polym13091526), 2021-05-10
Supplement: s1 [file s1]

## Supplemental information

### Methods

#### Synthesis of dextran-p-nitrophenyl carbonate

LiCl (4.0 g, dried at 115 °C) and dextran (5.00 g, 30.8 mmol repeating units (r.u.)) are weighed into a 500 mL three necked round bottom flask equipped with a stirrer bar. The flask is evacuated and refilled with nitrogen 3 times, after which it is left under vacuum at 95 °C for 1.5h. After thoroughly drying, the flask was filled with nitrogen and 200 mL of anhydrous DMF was added via a cannula while stirring. The flask was then equipped with a thermometer and the mixture was heated to 95 °C while stirring the solution. Once the dextran was completely dissolved, the solution was cooled to 0 °C and anhydrous pyridine (2.0 mL, 25.8 mmol) was added. Subsequently, freshly sublimed para-nitrophenyl chloroformate (2.5 g, 12.4 mmol) was added in small portions, while keeping the temperature below 2 °C. After 1 hour, the reaction mixture was poured into 1 L of ice-cold ethanol. The precipitate was filtered off (Por 4) and washed with cold ethanol (3×100 mL) and subsequently with diethyl ether (3×100 mL). After drying under vacuum, the product was obtained as a white powder (6.00 g, 30.7 mmol r.u., 99 % yield, DS20%). <sup>1</sup>H-NMR (400 MHz, DMSO-d<sub>6</sub>): δ(ppm) = 3.0-4.0 (saccharide ring protons, m, 6H); 4.2-5.8 (anomeric and hydroxyl protons, m, 4H); 7.58 (Ar o-CH, d, 2H); 8.34 (Ar m-CH, d, 2H).

#### Synthesis of dextran-tyramine

Dextran-PNC (6.00 g, 30.7 mmol r.u., 6.15 mmol p-nitrophenyl carbonate) was weighed into a 250 mL three necked round bottom flask equipped with a stirrer bar. The flask was evacuated and refilled with nitrogen 3 times, after which the flask was filled with nitrogen and 100 mL of anhydrous DMF was added via a cannula while stirring. Once the dextran was completely dissolved, tyramine (1.69 g, 12.3 mmol) was added. After 1 hour, the reaction mixture was poured into 1 L of ice-cold ethanol. The precipitate was filtered off (Por 4) and washed with cold ethanol (3×100 mL) and subsequently with diethyl ether (3×100 mL). After drying under vacuum, the crude product was obtained as a white powder. The crude product was dissolved in 75 mL of Milli-Q water and dialysed against Milli-Q water for 3 days (MWCO 3500 Da), followed by filter sterilization and freeze-drying yielding the product as a white foam (5.04 g, 28.0 mmol, 92 % yield, DS10%). <sup>1</sup>H-NMR (400 MHz, DMSO-d<sub>6</sub>): δ(ppm) = 3.0-4.0 (saccharide ring protons, m, 6H); 4.2-5.8 (anomeric and hydroxyl protons, m, 4H); 6.67 (Ar m-CH, d, 2H); 6.99 (Ar o-CH, d, 2H).

The calculation of the DS of dextran-TA and dextran-PNC is based on the integrals of 4.2-5.8 ppm (corresponding to the 4 anomeric protons from dextran), compared with the integral of the aromatic protons of tyramine (6.60-6.75 and 6.90-7.07) or para-nitrophenyl (7.40-7.65 and 8.20-8.40). The DS of dextran is given as the percentage of saccharide units modified in dextran.

#### Synthesis of hyaluronic acid-tyramine

Sodium hyaluronate (5.00 g, 12.5 mmol r.u.) was dissolved in 500 mL Milli-Q water in a 1 L round bottom flask equipped with a stirrer bar. While stirring at room temperature, 4-(4,6-dimethoxy-1,3,5-triazin-2-yl)-4-methylmorpholinium chloride (DMTMM, 3.46 g, 12.5 mmol, 1eq) and tyramine hydrochloride (TA·HCl, 2.17 g, 12.5 mmol, 1eq) were added subsequently. The addition of DMTMM and TA·HCl was repeated after 24 and 48 hours. After 72 hours, 40 mL NaCl (sat) was added to the reaction mixture and the reaction mixture was poured into 2.5 L cold ethanol. The crude product was isolated by centrifugation at 5000 rpm followed by drying in vacuo. The crude product was dissolved in 75 mL Milli-Q water and dialysed against Milli-Q water for 3 days (MWCO 1000 Da). Filter sterilization and lyophilization yielded the product as a white foam (5.10 g, 12.4 mmol, 99 % yield, DS10%). <sup>1</sup>H-NMR (400 MHz, D<sub>2</sub>O): δ(ppm) = 1.98 (acetyl-CH<sub>3</sub>, s, 3H); 2.75 (2-CH<sub>2</sub>, s, 2H); 2.90 (1-CH<sub>2</sub>, s, 2H); 3.2-4.2 (saccharide ring, m, 10H); 4.34 (s, 1H); 4.43 (d, 1H); 6.84 (Ar m-CH, d, 2H); 7.16 (Ar o-CH, d, 2H).

The degree of substitution (DS) was calculated based on the integral of the methyl group at 1.98 ppm is compared to the integral of the tyramine signals at 6.80-6.87 and 7.10-7.21 ppm. The DS of hyaluronic acid is given as the percentage of COOH groups modified in hyaluronic acid (i.e. per disaccharide).

Crosslinking density

The crosslink density was calculated based on the classical rubber elasticity theory:

$$G' = \nu_e RT \vartheta^{1/3} \quad (\text{eq. S1})$$

With the effective crosslink density,  $\nu_e$ , the shear storage modulus,  $G'$ , and the polymer volume fraction,  $\vartheta$ .

Table S1. Effective crosslink density,  $\nu_e$  (mM).

|                     | A    | B    | C    | D    | E    |
|---------------------|------|------|------|------|------|
| <b>D0 5%</b>        | 2.46 | 0.91 | 0.86 | 0.66 | 0.35 |
| <b>D0 5% cells</b>  | 1.27 | 0.89 | 0.51 | 0.44 | 0.35 |
| <b>D0 10%</b>       | 2.70 | 5.01 | 4.25 | 3.11 | 2.37 |
| <b>D0 10% cells</b> | 3.10 | 4.03 | 2.87 | 2.16 | 1.60 |

### Supplemental Figures

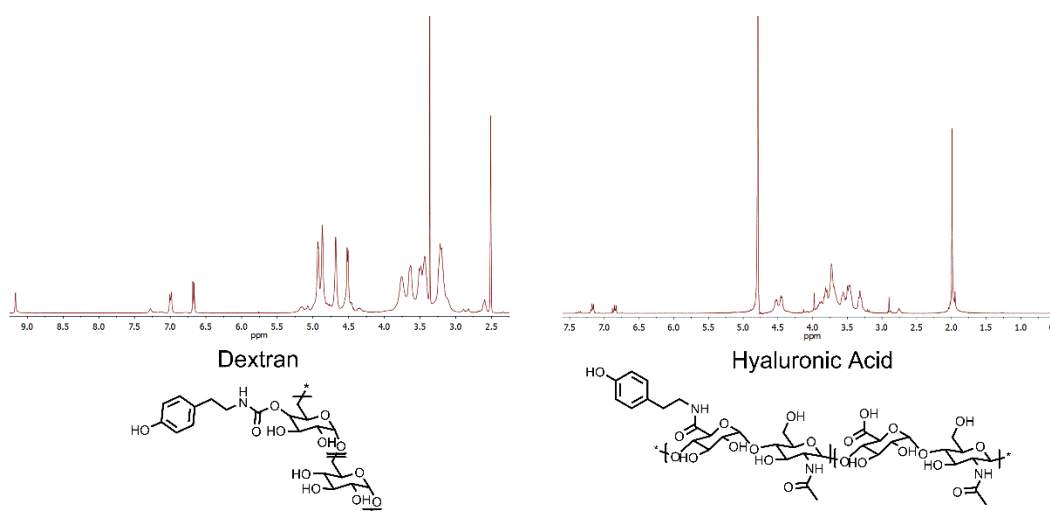

Figure S1. <sup>1</sup>H NMR spectra of dextran and hyaluronic acid tyramine conjugates (Dex-TA and HA-TA). (a) Dextran-tyramine conjugates were successfully prepared by subsequent activation of dextran by PNC and reaction with tyramine. The final product had a substitution degree of 10%, i.e. 10% of the monosaccharides of dextran have been modified, which was confirmed by <sup>1</sup>H-NMR. (b) HA was conjugated in a single step amidation, and the carboxyl group was activated by DMTMM producing an ester, which is converted into an amide in the presence of tyramine. DMTMM as single step amidation agent was first described by Kunishima et al. [1]. HA-TA had a substitution degree of 10%, i.e. 10% of the carboxylic acid groups (i.e. disaccharides) of hyaluronic acid have been modified, which was confirmed by <sup>1</sup>H-NMR.

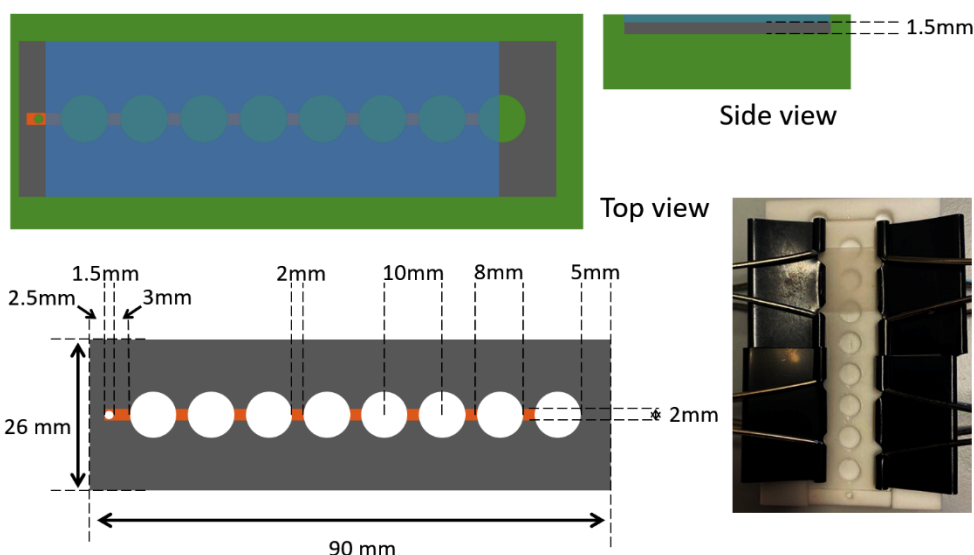

Figure S2. Sketches of the prepared hydrogel molds, composed of a Teflon base (green), a 1.5 mm thick Teflon insert (grey) with a 0.75 mm deep groove (orange) connecting the 8mm diameter holes for the hydrogels. The mold is covered with a glass slide leaving the inlet (left) and outlet (right) uncovered.

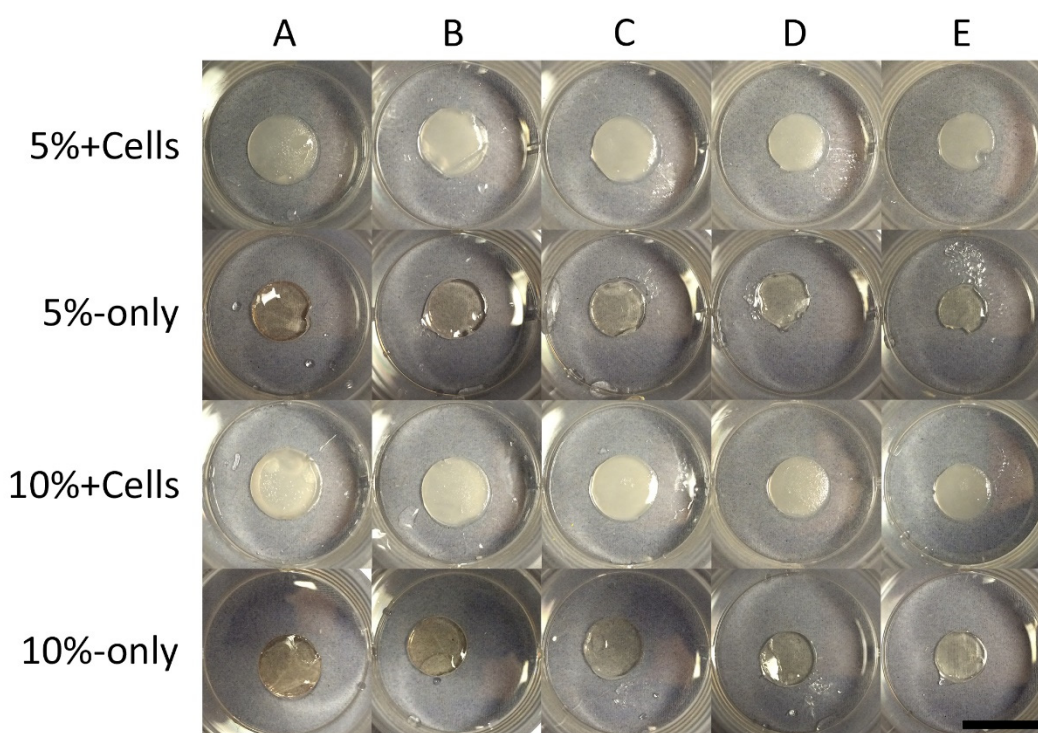

Figure S3. Overview morphology of 5%w/v and 10%w/v hydrogels with or without cells. From condition A to E show the different mix ratio of HA and Dex (100:0, 75:25, 50:50, 25:75, 0:100). The size of hydrogels decreased from condition A to E in both with and without cell groups, while the combination of cells increases the gel size. Scale bar = 10 mm.

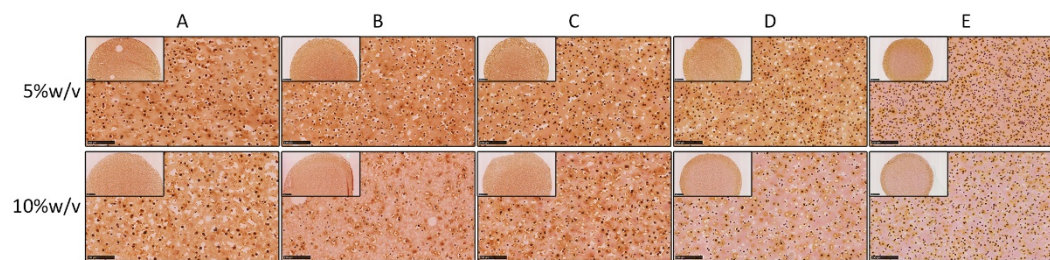

Figure S4. Safranin O staining of 5%w/v and 10%w/v hydrogels encapsulated with chondrocytes after culturing for 21 days in the chondrogenic medium. Inserts indicate the overview of each hydrogel; scale bar = 1 mm. Pictures show the magnified view of each hydrogel; scale bar = 250  $\mu$ m.

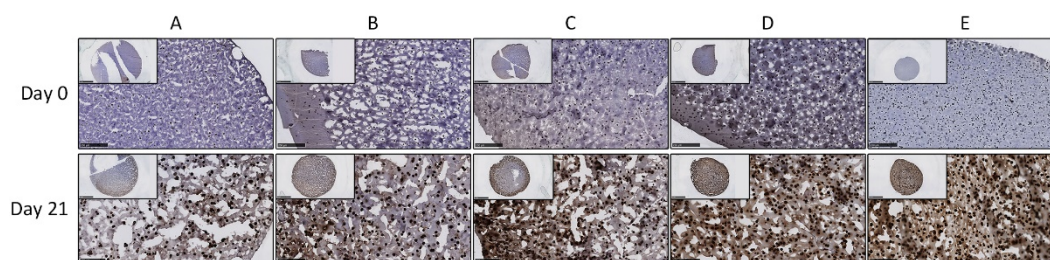

Figure S5. Immunohistochemistry staining of collagen type II for 5%w/v hydrogels encapsulated with chondrocytes after 0- or 21-days culturing in the chondrogenic medium. Inserts indicate the overview of each hydrogel; scale bar = 2.5 mm. Pictures show the magnified view of each hydrogel; scale bar = 250  $\mu$ m.

## References

1. Kunishima, M.; Kawachi, C.; Monta, J.; Terao, K.; Iwasaki, F.; Tani, S. 4-(4,6-dimethoxy-1,3,5-triazin-2-yl)-4-methyl-morpholinium chloride: An efficient condensing agent leading to the formation of amides and esters. *Tetrahedron* 1999, 55, 13159–13170, doi:10.1016/S0040-4020(99)00809-1.
